# Supplementary material for: BatchBMD as an Efficient and Accurate Dual-Energy X-ray Absorptiometry Report Generator
Source: MDPI journal article supplement (doi:10.3390/diagnostics11122403), 2021-12-20
Supplement: s1 [file s1]

# Supplementary Materials

(a)

Taipei Municipal Wan Fang Hospital  
No.111, Hsing-Long Road, Sec. 3, Taipei 116, Taiwan, R.O.C.,  
(02) 2930-7930 ext:1301

|                          |                  |                      |                                                                                     |                     |                         |
|--------------------------|------------------|----------------------|-------------------------------------------------------------------------------------|---------------------|-------------------------|
| <b>Patient :</b>         |                  | <b>Indications :</b> | Menopause<br>(Yes),<br>Secondary<br>Osteoporosis,<br>History of<br>Fracture (Adult) | <b>Patient ID :</b> |                         |
| <b>Birth Date :</b>      | 73.1 years       |                      |                                                                                     | <b>Exam ID :</b>    |                         |
| <b>Height / Weight :</b> | 158.3 cm 79.8 kg | <b>Treatment :</b>   | No                                                                                  | <b>Measured :</b>   | 2020/12/10 □ □ 11:35:40 |
| <b>Sex / Ethnic :</b>    | Female Asian     | <b>Fracture :</b>    | FFx1                                                                                | <b>M.P. Age :</b>   | 50                      |

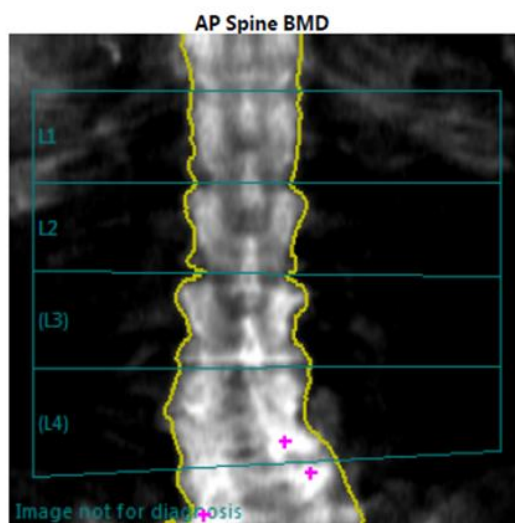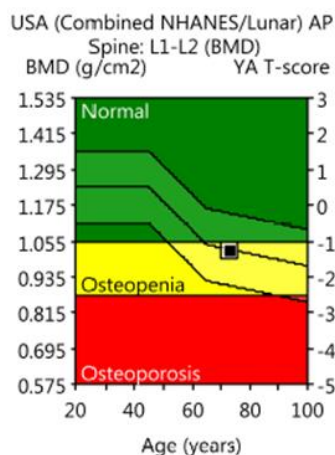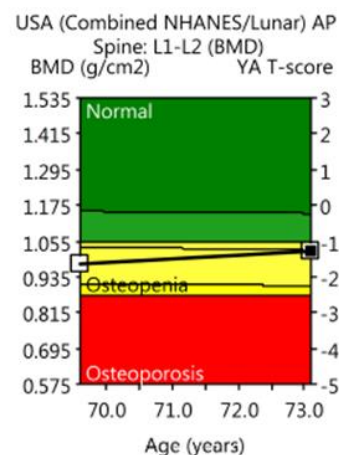

COMMENTS: 51739(J)

| BMD : USA (Combined NHANES/Lunar) |                          |                     |
|-----------------------------------|--------------------------|---------------------|
| Region                            | BMD (g/cm <sup>2</sup> ) | Young-Adult T-score |
| L1                                | 1.017                    | -1.0                |
| L2                                | 1.024                    | -1.5                |
| L3                                | 1.175                    | -0.3                |
| L4                                | 1.428                    | 1.6                 |
| L1-L2                             | 1.020                    | -1.3                |

| BMD Trend : L1-L2 |                      |                          |                        |                           |
|-------------------|----------------------|--------------------------|------------------------|---------------------------|
| Measured Date     | Birth Date □ years □ | BMD (g/cm <sup>2</sup> ) | Change vs Baseline (%) | Change vs Baseline (%/yr) |
| 2020/12/10        | 73.1                 | 1.020                    | 4.1 *                  | 1.1 *                     |
| 2017/5/24         | 69.6                 | 0.980                    | baseline               | baseline                  |

(\*) Indicates significant change based on 95% confidence interval. (LSC = 0.036 g/cm<sup>2</sup> for AP Spine L1-L2); Statistically 68% of repeat scans fall within 1SD (± 0.013 g/cm<sup>2</sup> for AP Spine L1-L2); USA (Combined NHANES (ages 20-30) / Lunar (ages 20-40)) AP Spine Reference Population (v113); World Health Organization - Definition of Osteoporosis and Osteopenia for Caucasian Women: Normal = T-score at or above -1.0 SD; Osteopenia = T-score between -1.0 and -2.5 SD; Osteoporosis = T-score at or below -2.5 SD; (WHO definitions only apply when a young healthy Caucasian Women reference database is used to determine T-scores.)  
Date created: 2021/10/19 □ □ 03:47:51 15 [SP 1]; Filename: ypt3lq6fp9.dfx; AP Spine; 76:3.00:50.03:12.0 0.00:10.56 0.60x1.05 23.4%Fat=41.0%; 0.00:0.00 0.00:0.00; Scan Mode: Standard;OneScan; 37.0 µGy

(b)

Taipei Municipal Wan Fang Hospital  
No.111, Hsing-Long Road, Sec. 3, Taipei 116, Taiwan, R.O.C.,  
(02) 2930-7930 ext:1301

|                          |                  |                      |                                                                            |                     |                         |
|--------------------------|------------------|----------------------|----------------------------------------------------------------------------|---------------------|-------------------------|
| <b>Patient :</b>         |                  | <b>Indications :</b> | Menopause (Yes),<br>Secondary Osteoporosis,<br>History of Fracture (Adult) | <b>Patient ID :</b> |                         |
| <b>Birth Date :</b>      | 73.1 years       |                      |                                                                            | <b>Exam ID :</b>    |                         |
| <b>Height / Weight :</b> | 158.3 cm 79.8 kg | <b>Treatment :</b>   | No                                                                         | <b>Measured :</b>   | 2020/12/10 □ □ 11:35:40 |
| <b>Sex / Ethnic :</b>    | Female Asian     | <b>Fracture :</b>    | FFx1                                                                       | <b>M.P. Age :</b>   | 50                      |

## DualFemur BMD

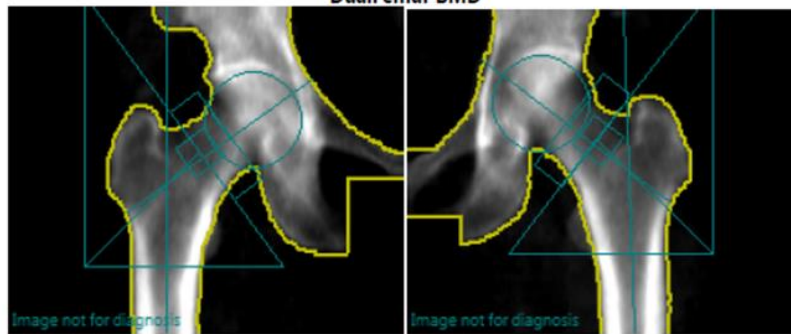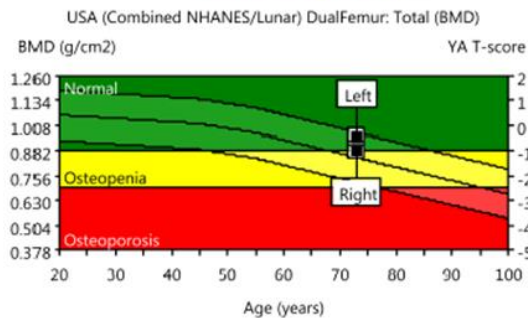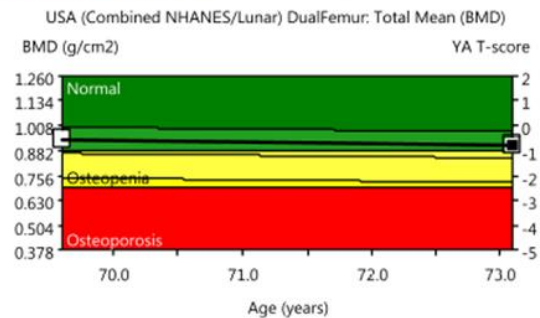

| BMD : USA (Combined NHANES/Lunar) |             |                     |
|-----------------------------------|-------------|---------------------|
| Region                            | BMD (g/cm2) | Young Adult T-score |
| Neck Left                         | 0.823       | -1.5                |
| Neck Right                        | 0.791       | -1.8                |
| Neck Mean                         | 0.807       | -1.7                |
| Total Left                        | 0.947       | -0.5                |
| Total Right                       | 0.886       | -1.0                |
| Total Mean                        | 0.916       | -0.7                |

HAL chart results unavailable

| Trend : Total Mean |                        |             |                        |                           |
|--------------------|------------------------|-------------|------------------------|---------------------------|
| Measured Date      | Measured Age □ years □ | BMD (g/cm2) | Change vs Baseline (%) | Change vs Baseline (%/yr) |
| 2020/12/10         | 73.1                   | 0.916       | -0.025 *               | -2.7 *                    |
| 2017/5/24          | 69.6                   | 0.941       | baseline               | baseline                  |

(Right = 100.2 mm) (Left = 102.8 mm)

Right = 100.2 mm Avg = N/A mm Left = 102.8 mm

## COMMENTS: 51739(J)

(\*) Indicates significant change based on 95% confidence interval. (LSC = 0.022 g/cm2 for DualFemur Total); Statistically 68% of repeat scans fall within 1SD ( $\pm 0.008$  g/cm2 for DualFemur Total); USA (Combined NHANES (ages 20-30) / Lunar (ages 20-40)) Femur Reference Population (v113); World Health Organization - Definition of Osteoporosis and Osteopenia for Caucasian Women: Normal = T-score at or above -1.0 SD; Osteopenia = T-score between -1.0 and -2.5 SD; Osteoporosis = T-score at or below -2.5 SD; (WHO definitions only apply when a young healthy Caucasian Women reference database is used to determine T-scores.)

Date created: 2021/10/19 □ □ 03:47:46 15 [SP 1]; Filename: ypt3lq6fp9.dfx; ; Left Femur; 76:3.00:50.03:12.0 0.00:10.20 0.60x1.05 19.6%:Fat=33.6%; 0.00:0.00 0.00:0.00; Neck Angle (deg)= 53; Scan Mode: Standard; 37.0  $\mu$ Gy; Right Femur; 76:3.00:50.03:12.0 0.00:12.06 0.60x1.05 20.1%:Fat=32.4%; 0.00:0.00 0.00:0.00; Neck Angle (deg)= 54; Scan Mode: Standard; 37.0  $\mu$ Gy

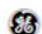

GE Healthcare

□ □ 1 □ 1

Lunar Prodigy  
DF+300285

(c)

Taipei Municipal Wan Fang Hospital  
No.111, Hsing-Long Road, Sec. 3, Taipei 116, Taiwan, R.O.C.,  
(02) 2930-7930 ext:1301

|                   |                  |               |                                                                            |              |                         |
|-------------------|------------------|---------------|----------------------------------------------------------------------------|--------------|-------------------------|
| Patient :         |                  | Indications : | Menopause (Yes),<br>Secondary Osteoporosis,<br>History of Fracture (Adult) | Patient ID : |                         |
| Birth Date :      | 73.1 years       |               |                                                                            | Exam ID :    |                         |
| Height / Weight : | 158.3 cm 79.8 kg | Treatment :   | No                                                                         | Measured :   | 2020/12/10 □ □ 11:35:40 |
| Sex / Ethnic :    | Female Asian     | Fracture :    | FFx1                                                                       | M.P. Age :   | 50                      |

**FRAX\* 10-year Probability of Fracture**  
Based on femoral neck BMD □ DualFemur (Right)

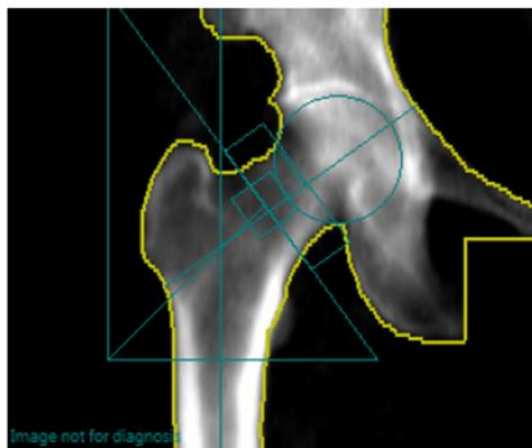

|                      |                                                     |
|----------------------|-----------------------------------------------------|
| Major Osteoporotic □ | 15.7%                                               |
| Hip □                | 4.3%                                                |
| Population :         | Taiwan                                              |
| Risk Factor :        | Secondary Osteoporosis, History of Fracture (Adult) |
| NOF/ISCD Filters:    | None                                                |

\*FRAX is a trademark of the University of Sheffield Medical School's Centre for Metabolic Bone Disease, a World Health Organization (WHO) Collaborating Centre.

FRAX Version 3.7; The 10-year probability of fracture may be lower than reported if the patient has received treatment; Major Osteoporotic Fracture: Clinical Spine, Forearm, Hip or Shoulder  
Date created: 2021/10/19 □ □ 03:47:47 15 [SP 1]; Filename: ypt3lq6fp9.dfx; Right Femur; 76:3.00:50.03:12.0 0.00:12.06 0.60x1.05 20.1:%Fat=32.4%; 0.00:0.00 0.00:0.00; Neck Angle (deg)= 54; Scan Mode: Standard; 37.0 µGy; Left Femur; 76:3.00:50.03:12.0 0.00:10.20 0.60x1.05 19.6:%Fat=33.6%; 0.00:0.00 0.00:0.00; Neck Angle (deg)= 53; Scan Mode: Standard; 37.0 µGy;



(d)

Taipei Municipal Wan Fang Hospital  
No.111, Hsing-Long Road, Sec. 3, Taipei 116, Taiwan, R.O.C.,  
(02) 2930-7930 ext:1301

|                          |                  |                      |                 |                     |                     |
|--------------------------|------------------|----------------------|-----------------|---------------------|---------------------|
| <b>Patient :</b>         |                  | <b>Indications :</b> | Menopause (Yes) | <b>Patient ID :</b> |                     |
| <b>Birth Date :</b>      | 73.1 years       | <b>Treatment :</b>   | No              | <b>Exam ID :</b>    |                     |
| <b>Height / Weight :</b> | 158.3 cm 79.8 kg | <b>Fracture :</b>    | FFx1            | <b>Measured :</b>   | 2020/12/10 11:28:52 |
| <b>Sex / Ethnic :</b>    | Female Asian     |                      |                 | <b>M.P. Age :</b>   | 50                  |

LVA Morphometry

| Region | Avg. Ht. | P/A Ratio | M/P Ratio | A/P Ratio |
|--------|----------|-----------|-----------|-----------|
|        | □ %□     | □ %□      | □ %□      | □ %□      |
| L2     | 103      | 102       | 95        | 98        |
| L3     | 101      | 99        | 97        | 101       |
| L4     | 96       | 101       | 97        | 99        |

COMMENTS: 51739(J)

Reference based on L2, L3, and L4; The precision ( $\pm 1SD$ ) is 1mm for heights and 0.05 for ratios  
Date created: 2021/10/19 03:45:40 15 [SP 1]; Filename: nit3lq6fp9.dfm; LVA: 76.3.00:22:24:54.  
0 0.00:17.92 1.20x1.05 26.9%Fat=24.6%; 0.00:0.00 0.00:0.00; Scan Mode: Standard; 83.0  $\mu$ Gy

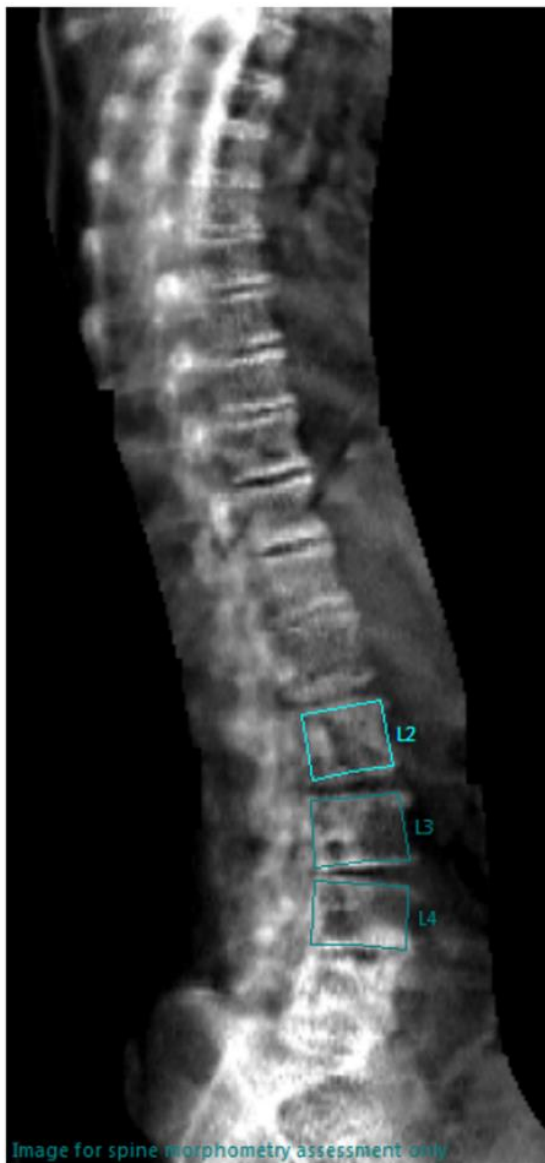

(e)

**Taipei Municipal Wan Fang Hospital**  
No.111, Hsing-Long Road, Sec. 3, Taipei 116, Taiwan, R.O.C.,  
(02) 2930-7930 ext:1301

|                          |                  |                      |                                            |                     |                         |
|--------------------------|------------------|----------------------|--------------------------------------------|---------------------|-------------------------|
| <b>Patient :</b>         |                  | <b>Indications :</b> | Menopause (Yes),<br>Secondary Osteoporosis | <b>Patient ID :</b> |                         |
| <b>Birth Date :</b>      | 73.1 years       |                      |                                            | <b>Exam ID :</b>    |                         |
| <b>Height / Weight :</b> | 158.3 cm 79.8 kg | <b>Treatment :</b>   | No                                         | <b>Measured :</b>   | 2020/12/10 □ □ 11:44:06 |
| <b>Sex / Ethnic :</b>    | Female Asian     | <b>Fracture :</b>    | FFx1                                       | <b>M.P. Age :</b>   | 50                      |

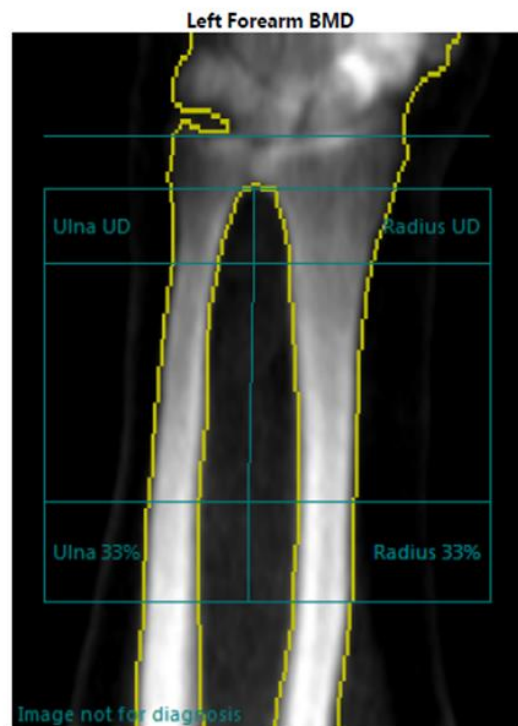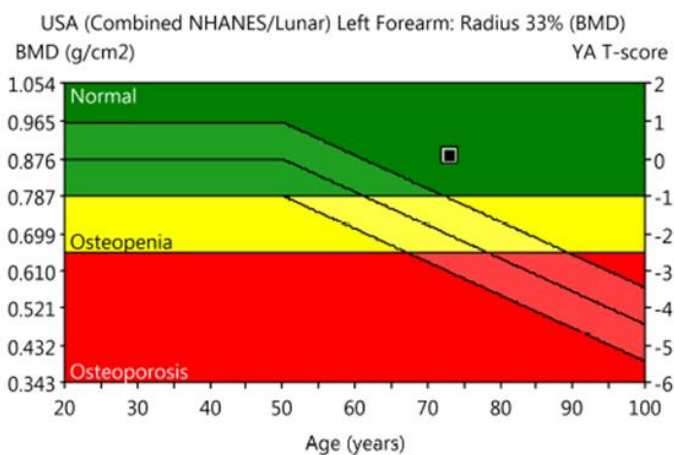

**BMD : USA (Combined NHANES/Lunar)**

| Region     | BMD (g/cm <sup>2</sup> ) | Young-Adult T-score |
|------------|--------------------------|---------------------|
| Radius 33% | 0.882                    | 0.1                 |

COMMENTS: 51739(J)

Statistically 68% of repeat scans fall within 1SD ( $\pm 0.020$  g/cm<sup>2</sup> for Left Forearm Radius 33%); USA (Combined NHANES (ages 20-30) / Lunar (ages 20-40)) Forearm Reference Population (v113); Lunar calibration in use.; World Health Organization - Definition of Osteoporosis and Osteopenia for Caucasian Women: Normal = T-score at or above -1.0 SD; Osteopenia = T-score between -1.0 and -2.5 SD; Osteoporosis = T-score at or below -2.5 SD; (WHO definitions only apply when a young healthy Caucasian Women reference database is used to determine T-scores.)

Date created: 2021/10/19 □ □ 03:49:03 15 [SP 1]; Filename: wau3lq6fp9.dfa; Left Forearm; 76:0.15:50.03:12.0 0.00:6.20 0.60x1.05 5.0:%Fat=42.3%; 0.00:0.00 0.00:0.00; Forearm Length: 25.1 cm; Scan Mode: Standard;Not seated; 2.0  $\mu$ Gy

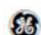

GE Healthcare

□ □ 1 □ 1

Lunar Prodigy  
DF+300285

(f)

Taipei Municipal Wan Fang Hospital  
No.111, Hsing-Long Road, Sec. 3, Taipei 116, Taiwan, R.O.C.,  
(02) 2930-7930 ext:1301

|                          |                  |                      |                                            |                     |                     |
|--------------------------|------------------|----------------------|--------------------------------------------|---------------------|---------------------|
| <b>Patient :</b>         |                  | <b>Indications :</b> | Menopause (Yes),<br>Secondary Osteoporosis | <b>Patient ID :</b> |                     |
| <b>Birth Date :</b>      | 73.1 years       | <b>Treatment :</b>   | No                                         | <b>Exam ID :</b>    |                     |
| <b>Height / Weight :</b> | 158.3 cm 79.8 kg | <b>Fracture :</b>    | FFx1                                       | <b>Measured :</b>   | 2020/12/10 11:52:17 |
| <b>Sex / Ethnic :</b>    | Female Asian     |                      |                                            | <b>M.P. Age :</b>   | 50                  |

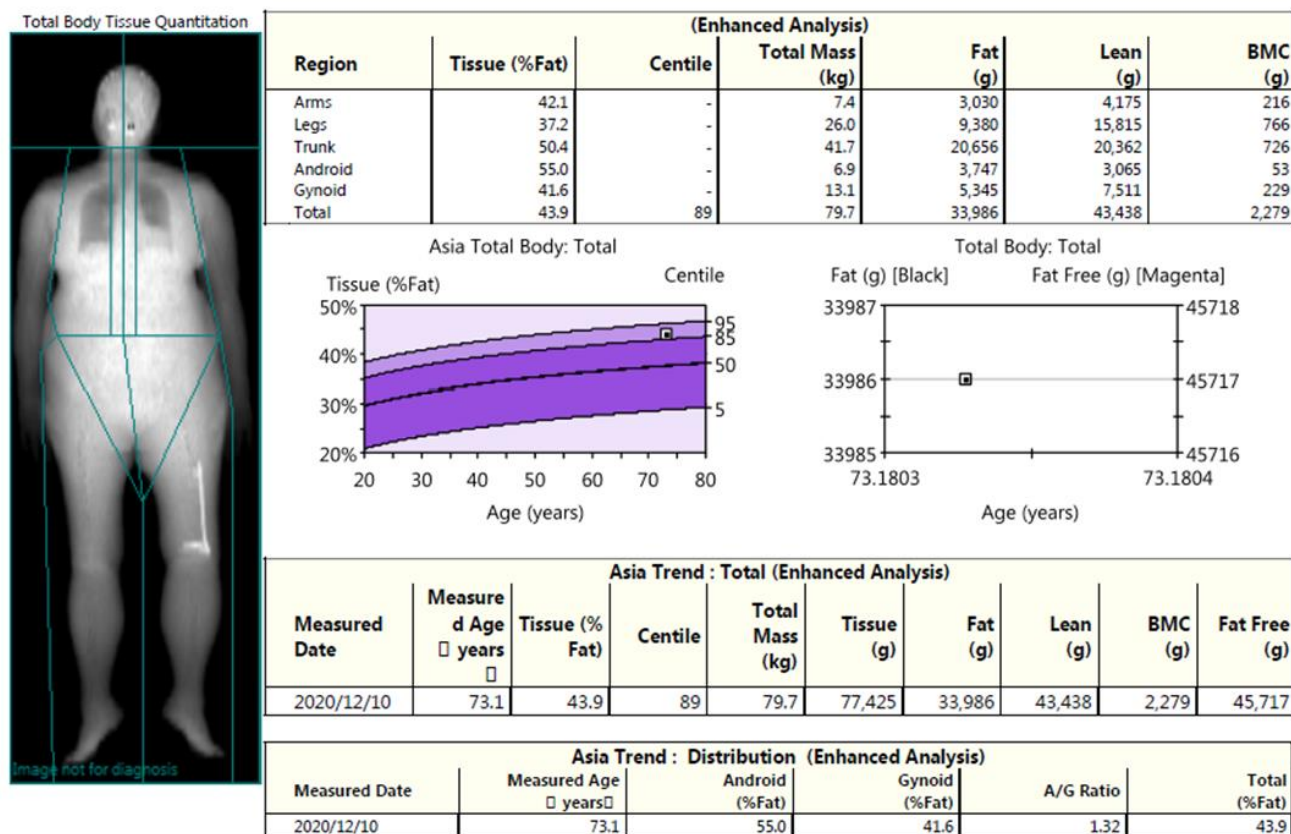

Appendicular Skeletal Muscle Index(ASMI): 7.98 kg/m<sup>2</sup>

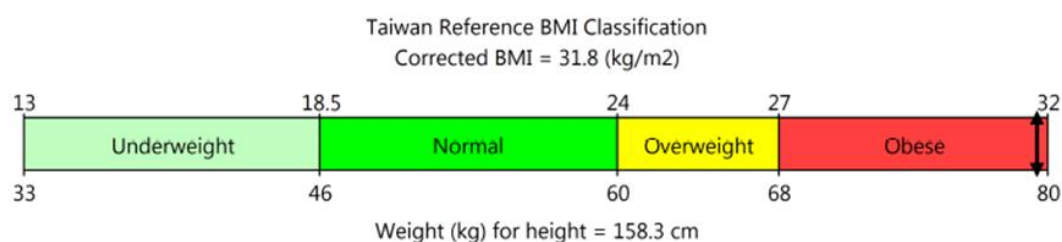

Statistically 68% of repeat scans fall within 1SD ( $\pm 0.8\%$  Fat,  $\pm 210$  g Tissue Mass,  $\pm 520$  g Fat Mass,  $\pm 610$  g Lean Mass for Total Body Total); Asia Total Body Composition Reference Population (v111); Composition Matched for Age  
Date created: 2021/10/19 03:49:30 15 [SP 1]; Filename: mgu3lq6fp9.dfb; Total Body: 76:0.15:153.04:31.4 0.00:-1.00 4.81x13.01 13.1:%Fat=43.9%; 0.00:0.00 0.00:0.00; Scan Mode: Standard; 0.4  $\mu$ Gy

GE Healthcare

□ □ 1 □ 1

Lunar Prodigy  
DF+300285

**Figure S1.** DXA report example: (a) AP spine BMD; (b) Dual femur BMD; (c) FRAX\* 10-year probability of fracture; (d) LVA Morphometry; (e) Left forearm BMD; (f) Body composition.



(a)

Patient Name: Patient ID: Birth Date: Measured: 2020/12/10

Baseline bone mineral density (BMD) quantification of a 73.1-year-old postmenopausal woman (postmenopausal at 50 years old) at multiple skeletal sites was performed using a dual-energy X-ray absorptiometry scanner (GE-Lunar Prodigy) on 2020/12/10.

Results:

The T-score is calculated using a USA combined (NHANES, ages 20-30/Lunar, ages 20-40) AP spine and femur reference population.

> BMD at the lumbar spine: average BMD at L1-L2 is 1.020 g/cm<sup>2</sup>.

(L3 and L4 not quantified due to artifacts / osteophytes / sclerosis / adjacent score > 1) (not an automatic selection; this must be selected by a reporting doctor).

>BMD at the left proximal femur: femoral neck is 0.823 g/cm<sup>2</sup> and total femur is 0.947 g/cm<sup>2</sup>.

>BMD at the right proximal femur: femoral neck is 0.791 g/cm<sup>2</sup> and total femur is 0.886 g/cm<sup>2</sup>.

>BMD at the left forearm: radius 33% is 0.882 g/cm<sup>2</sup>.

>BMD at the right forearm: radius 33% is N/A g/cm<sup>2</sup>.

>VFA: No vertebral compression fractures are noted.

>VFA: Compression fracture at N/A is noted.

>Lowest T-score is -1.8.

Baseline densitometric assessment:

>Densitometric assessment:

**-2.5 < T-score < -1.0**

>The BMD fulfills the WHO densitometric classification for:

\*Low Bone Mass. (not an automatic diagnosis; this must be filled out by a reporting doctor).

> Integrated assessment:

\***Osteoporosis due to left femur fracture.** (not an automatic diagnosis; this must be filled out by a reporting doctor).

>Because the T-score is between -1.0 and -2.5, the FRAX™ 10-year probability calculation shows that:

\*The risk for any major osteoporosis-related fracture is 15.7%

\*The risk for hip fracture is 4.3%

Follow up densitometric assessment:

>The interval significant change of total hip BMD is -2.7%/yr as compared to BMD measured on 2017/5/24.

Recommendations:

This is a baseline study. Follow-up studies are recommended as follows:

-Normal BMD: Consider monitoring (at postmenopause) in 1 year.

-Low bone mass: Consider monitoring in 1-2 years to assess the patient's response to therapy.

-Osteoporosis: Consider monitoring in 1-2 years to assess the patient's response to therapy.

Notes:

-T-score (mean value for young healthy individuals) is applied only to postmenopausal women or men at least 50 years old.

-Z-score (mean value for those of the same age) is applied only to premenopausal women, children, or men younger than 50 years.

-T-score Normative Database: A uniform Caucasian non-race-adjusted female normative database for both women and men of all ethnic groups, based on the 2019 ISCD Official Position.

-WHO definitions apply only when a reference database of young healthy Caucasian women is used to determine T-scores.

**(b)**

Quantification of total body tissue and whole body composition analysis were performed using a dual-energy X-ray absorptiometry scanner (DXA; Prodigy, GE-Lunar, USA).

Findings:

1. Percentage of fat tissue across the entire body is **43.9%**.
2. Total body mass is **79.7** kg which is composed of **33.986** kg fat, **43.438** kg lean mass, and **2.279** kg BMC (bone mineral content).
3. Fat distribution is predominantly Android (**55.0%**) and Gynoid (**41.6** %). The A/G ratio is **1.32**.
4. Body mass index (BMI) is **31.8**.
5. Handgrip strength is \_\_\_\_ kg. (*this must be filled out by a reporting doctor*)
6. Appendicular skeletal muscle index (ASMI) is **7.98** kg/m<sup>2</sup>.

Assessment:

1. The body status as indicated by BMI is **Moderate obesity**.

Remarks:

BMI indicates body status as follows: <18.5 is underweight, 18.5-<24 is normal, 24-<27 is overweight, 27-<30 is mild obesity, 30-<35 is moderate obesity, and  $\geq 35$  is marked obesity (Criteria from the Ministry of Health, Taiwan).

2. The percentage of fat tissue in the entire body is within the **89th** percentile using an Asian reference population.

3. Handgrip strength is normal. (*this must be selected by a reporting doctor*)

Handgrip strength is low.

Remarks: ASIAN WORKING GROUP OF SARCOPENIA(AWGS)

Low handgrip strength: <22.4 kg for men, <14.3 kg for women.

4. Normal muscle mass. (*this must be selected by a reporting doctor*)

Remarks: ASIAN WORKING GROUP OF SARCOPENIA(AWGS)

Low muscle mass: ASMI (RSMI or ASM/ht<sup>2</sup>) <7.0 kg/m<sup>2</sup> for men, <5.4 kg/m<sup>2</sup> for women.

Integrated assessment: (*this must be selected by a reporting doctor*)

No sarcopenia.

Sarcopenia.

Sarcopenia probable.

Recommendations:

1. This is a baseline study, and a follow-up study is recommended when body weight changes 5% to 10%.
2. In clinical practice, a patient with low handgrip strength and normal muscle mass should be assessed for causes, and intervention should be initiated.

**Figure S2.** Report Templates. (a) the BMD report template; (b) the whole body composition report template. Data shown in red are auto-filled by the reporting system.
